# Supplementary material for: How Can Out-of-Hospital Cardiac Arrest (OHCA) Data Collection in Slovenia Be Improved?
Source: MDPI journal article supplement (doi:10.3390/medicina59061050), 2023-05-30
Supplement: s1 [file s1]

Petravić, L.; Burger, E.; Keše, U.; Kulovec, D.; Miklič, R.; Poljanšek, E.; Tomšič, G.; Pintarič, T.; Lopes, M.F.; Turnšek, E.; et al. How Can Out-of-Hospital Cardiac Arrest (OHCA) Data Collection in Slovenia Be Improved? *Medicina* **2023**

## Supplement 1: List of all OHCA registries found

Table S1: List of all OHCA registries found, with their respective name and country of origin

| Registry                                                           | Country             | Source |
|--------------------------------------------------------------------|---------------------|--------|
| The Australasian Resuscitation Outcomes Consortium (Aus-ROC)       | Australia and Asia  | [29]   |
| Victorian Ambulance Cardiac Arrest Registry (VACAR)                | Australia Victoria  | [30]   |
| Austrian resuscitation council (ARC)                               | Austria             | [31]   |
| Helsinki Cardiac Arrest Registry                                   | Finland, Helsinki   | [32]   |
| German Resuscitation Registry                                      | Germany             | [33]   |
| Utstein Osaka Project                                              | Japan               | [34]   |
| CARDioVAsCular disease Surveillance (CAVAS) project                | Korea, Seoul        | [35]   |
| Amsterdam resuscitation studies (ARREST)                           | Netherlands         | [36]   |
| Norwegian Cardiac Arrest Registry (NorCAR)                         | Norway              | [37]   |
| The Silesian Registry of Out-of-Hospital Cardiac Arrest (SIL-OHCA) | Poland              | [38]   |
| Irish Out of Hospital Cardiac Arrest Register (OHCAR)              | Republic of Ireland | [39]   |
| Swedish Register of Cardiopulmonary Resuscitation                  | Sweden              | [40]   |
| Taipei OHCA Registry                                               | Taiwan Taipei       | [41]   |

|                                                     |                          |      |
|-----------------------------------------------------|--------------------------|------|
| Cardiac Arrest Registry to Enhance Survival (CARES) | United states of America | [42] |
| Resuscitation Outcomes Consortium (ROC)             | US                       | [43] |

## References:

29. Variables « Aus-ROC Available online: <https://www.ausroc.org.au/epistry/variables/> (accessed on 9 April 2022).
30. Smith, K.L.; Bray, J.; Barnes, V.; Lodder, M.; Cameron, P.; Bernard, S.; Currell, A. Victorian Ambulance Cardiac Arrest Registry. *Resuscitation* **2010**, *81*, S4, doi:10.1016/j.resuscitation.2010.09.030.
31. Österreichischer Rat Für Wiederbelebung – ARC – Austrian Resuscitation Council Available online: <https://www.arc.or.at/> (accessed on 9 April 2022).
32. Skrifvars, M.B.; Vayrynen, T.; Kuisma, M.; Castren, M.; Parr, M.J.; Silfverstople, J.; Svensson, L.; Jonsson, L.; Herlitz, J. Comparison of Helsinki and European Resuscitation Council “Do Not Attempt to Resuscitate” Guidelines, and a Termination of Resuscitation Clinical Prediction Rule for out-of-Hospital Cardiac Arrest Patients Found in Asystole or Pulseless Electrical Activity. *Resuscitation* **2010**, *81*, 679–684, doi:10.1016/j.resuscitation.2010.01.033.
33. Formulare | Deutsches Reanimationsregister Available online: <https://www.reanimationsregister.de/downloads/formulare.html> (accessed on 9 April 2022).
34. Kitamura, T.; Iwami, T.; Atsumi, T.; Endo, T.; Kanna, T.; Kuroda, Y.; Sakurai, A.; Tasaki, O.; Tahara, Y.; Tsuruta, R.; et al. The Profile of Japanese Association for Acute Medicine – out-of-Hospital Cardiac Arrest Registry in 2014–2015. *Acute Med. Surg.* **2018**, *5*, 249–258, doi:10.1002/ams2.340.
35. Kim, J.Y.; Hwang, S.O.; Shin, S.D.; Yang, H.J.; Chung, S.P.; Lee, S.W.; Song, K.J.; Hwang, S.S.; Cho, G.C.; Moon, S.W.; et al. Korean Cardiac Arrest Research Consortium (KoCARC): Rationale, Development, and Implementation. *Clin. Exp. Emerg. Med.* **2018**, *5*, 165, doi:10.15441/ceem.17.259.
36. Academic Medical Centre – ESCAPE-NET Available online: <https://escape-net.eu/consortium/academic-medical-centre/> (accessed on 9 April 2022).
37. Norwegian Cardiac Arrest Registry (NorCAR) Available online: <http://helsedata.no/en/forvaltere/norwegian-institute-of-public-health/norwegian-cardiac-arrest-registry/> (accessed on 9 April 2022).
38. Nadolny, K.; Bujak, K.; Kucap, M.; Trzeciak, P.; Hudzik, B.; Borowicz, A.; Gąsior, M. The Silesian Registry of Out-of-Hospital Cardiac Arrest: Study Design and Results of a Three-Month Pilot Study. *Cardiol. J.* **2020**, *27*, 566–574, doi:10.5603/CJ.a2018.0140.
39. Out of Hospital Cardiac Arrest Register (OHCAR) - NUI Galway Available online: <https://www.nuigalway.ie/ohcar/#> (accessed on 9 April 2022).
40. Svenska HLR-registret 2021 Available online: <https://www.hlr.nu/svenska-hlr-registret/> (accessed on 9 April 2022).
41. Lin, H.-Y.; Chien, Y.-C.; Lee, B.-C.; Wu, Y.-L.; Liu, Y.-P.; Wang, T.-L.; Ko, P.C.-I.; Chong, K.-M.; Wang, H.-C.; Huang, E.P.-C.; et al. Outcomes of Out-of-Hospital Cardiac Arrests after a Decade of System-Wide Initiatives Optimising Community Chain of Survival in Taipei City. *Resuscitation* **2022**, *172*, 149–158, doi:10.1016/j.resuscitation.2021.12.027.
42. MyCares™ Available online: <https://mycares.net/> (accessed on 23 February 2022).
43. University of Ohio Resuscitation Outcomes Consortium (ROC) Available online: <https://www.ohsu.edu/school-of-medicine/emergency/resuscitation-outcomes-consortium-roc> (accessed on 10 April 2022).
